# Supplementary material for: Multi-stage hydrogel rockets with stage dropping-off by thermal/light stimulation
Source: Royal Society of Chemistry journal article supplement (doi:10.1039/c8ta06715e), 2018-01-01
Supplement: c8ta06715e1.pdf [file c8ta06715e1.pdf]

Electronic Supplementary Information (ESI):

## **Multi-stage hydrogel rockets with stage dropping-off by thermal/light stimulation**

Yuling Liang,<sup>a,b,ξ</sup> Yibin Xu,<sup>b,ξ</sup> Wei Ye,<sup>a</sup> Dahua Yao,<sup>a</sup> Yunhua Chen,<sup>\*c</sup> and Chaoyang Wang<sup>\*a</sup>

<sup>a</sup> Research Institute of Materials Science, South China University of Technology, Guangzhou 510640, China.

<sup>b</sup> Fujian Institute of Research On the Structure of Matter, Chinese Academy of Sciences, Fuzhou 350002, China.

<sup>c</sup> School of Materials Science and Engineering, South China University of Technology, Guangzhou 510640, China.

<sup>ξ</sup> These authors contributed equally to this work.

\*Corresponding authors. Email: zhywang@scut.edu.cn, msyhchen@scut.edu.cn

### **Supplementary videos description:**

**Video 1:** Drops of water and driving solution on the surface of SDS/PA-co-PN hydrogel.

**Video 2:** The temperature-controlled process for dropping off small rockets step-by-step from the small rocket/GltAg0/small rocket/GltAg6 multi-stage hydrogel rocket. (driving solution: 150 mM NaCl, 100 mM NaHCO<sub>3</sub>, and 50 mM glucose)

**Video 3:** The propulsion of two multi-stage hydrogel rockets, including small rocket/GltAg0/small rocket/GltAg6 and small rocket/GltAg16/small rocket/GltAg16. (driving solution: 150 mM NaCl, 100 mM NaHCO<sub>3</sub>, and 50 mM glucose)

**Video 4:** The NIR laser-irradiation process for dropping off small rockets step-by-step from the small rocket/GNS-GltAg0/small rocket/GNS-GltAg6 multi-stage hydrogel rocket. (driving solution: 150 mM NaCl, 100 mM NaHCO<sub>3</sub>, and 50 mM glucose)

## Experimental methods and characterization

**Preparation of hydrogel small-rockets.** The multi-stage hydrogel rocket comprises two sections: glucose responsive SDS/PA-co-PN hydrogel (small rocket section) and gelatin/agar gels (sacrificial section). The small rockets were fabricated as follows. Firstly, a mold substrate with multiple rocket-shaped holes (8 mm in length, 4 mm in width, and 120° of the arrow angle) was manufactured by utilizing silicone rubber. Note that small removable mold parts (2 mm in length, 4 mm in width, 2 mm in thickness, and 120° of the arrow angle) were equipped for preparing the subsequent sacrificial hydrogel stages. Secondly, 5.0 mg of clay nanosheets (Laponite XLG, BYK Additives & Instruments) was dispersed in 1.0 mL of deionized water to form homogeneous dispersion by stirring for 0.5 h. 56.6 mg of *N*-isopropylacrylamide (J&K Chemical) was dissolved in the Laponite XLG dispersion, and then 19.1 mg of 3-acrylamidophenylboronic acid (Shanghai Macklin Biochemical Technology), 9.3 mg of *N,N'*-methylenebis(acrylamide) (J&K Chemical) and 17.3 mg of sodium dodecyl sulphate (SDS, Sigma-Aldrich) were added. Thereafter, 5.4 mg of photoinitiator (2,2'-azobis(2-methylpropionamide) dihydrochloride, Sigma-Aldrich) and 10 µL of accelerator (*N,N,N',N'*-tetramethylethylenediamine, J&K Chemical) were added and purged with nitrogen gas for 10 min to remove oxygen. Thirdly, 20 µL of the prepared dispersion was injected into each hole and polymerized for 3 min under a UV lamp (1000 mW/cm<sup>2</sup>, LDST230-1000, Dongguan Landun Electrical Equipment Technology). The hydrogel small-rockets were then produced and remained in the mold.

**Gelatin/Agar mixture solutions.** The preparation of Gelatin/Agar mixture with different proportions involves several steps. Briefly, 1.0 g of gelatin (from cold water fish skin 40-50% in H<sub>2</sub>O, Sigma-Aldrich) was added into 500 µL of deionized water, and dissolved completely at 60 °C after 10 min. Meanwhile, a certain amount of agar (high gel strength (1000-1200 g/cm<sup>2</sup>), Shanghai Macklin Biochemical) was added in 500 µL of deionized water, and dissolved completely at 90 °C after 30 min. Subsequently, the two solutions were mixed and then diluted to obtain the total solid content of 10 wt% with deionized water at 60 °C. The content of agar was varied in the range of 0~16 parts by weight (based on 100 parts by weight

gelatin), which was named as GltAg0~GltAg16 according to the content of agar in the formula. The gelatin/agar mixture was dyed with butyl rosin B for clear observation. Additionally, 2 wt% of graphene nanosheets (ratio to the mass of gelatin/agar) was added to fabricate graphene incorporated gelatin/ agar gel, which was named as GNS-GltAg0~GNS-GltAg16.

**Preparation of multi-stage hydrogel rocket.** After producing the small rockets in the mold holes, the barriers (removable parts) were removed, and 20  $\mu$ L each of gelatin/Agar mixed solution with different proportions was dripped into the interval vacant space of the hydrogel rockets and stored in the refrigerator at 4 °C for 4 h to promote gelation. Two types of multi-stage hydrogel rockets were prepared, including small-rocket/GltAg0/small-rocket/GltAg6 and small-rocket/GNS-GltAg0/small-rocket/GNS-GltAg6 multi-stage hydrogel rocket. The small-rocket/GltAg16/small-rocket/GltAg16 hydrogel rocket was fabricated to serve as control sample.

**Enrofloxacin (ENR) release from multi-stage hydrogel rocket.** Enrofloxacin (Zhejiang Guobang Pharmaceutical) was loaded in both driving stages and sacrificial stages of the small-rocket/GNS-GltAg0/small-rocket/GNS-GltAg6 hydrogel rocket. ENR loaded into the driving stages was achieved by following the above similar process, with 10 mg of ENR being pre-added into the Laponite XLG dispersion. Similarly, ENR loaded into the sacrificial stages was realized by adding 10 mg of ENR into the 10 wt% of GNS-GltAg solution. The drug release process of multi-stage hydrogel rockets is in the presence of 50 mM glucose and 150 mM NaCl at 28 °C and pH 8. The release profiles of enrofloxacin (maximum absorption peak 270 nm) were obtained by a UV-visible spectrometer (Shimadzu UV-240).

**Contact angle measurements.** 1  $\mu$ L of water or driving solution (0.15 M NaCl, 0.10 M NaHCO<sub>3</sub>, and 0.05 M glucose) were dropped to the surface of SDS/PA-co-PN hydrogel. The change of liquid drops was recorded by Contact Angle System (OCA20) and the contact angles were analyzed.

**Dissolving temperatures of gelatin/agar gels.** The dissolving temperatures of gelatin/agar gels with different formulas were determined by ball-dropping method. Briefly, the GltAg0~GltAg16 solutions (2 mL for each formula) were orderly injected into glass tubes with 15 mm in diameter, and gelled in the refrigerator of 4 °C for 4 h. Then a steel bead (4 mm in diameter) was placed on the gel surface of each tube. Subsequently, the samples were placed in a super thermostatic water bath cycle machine (HWY-501) with 25 °C of initial temperature and 1 °C/min of heating rate. Upon temperature increase, the gelatin/agar gel samples gradually dissolved, the steel balls slowly sank until reaching the bottom of the tube and then the gel samples completely turned into free-flowing solutions. The temperature when the bead reaching the tube bottom was defined as the dissolving temperature of gelatin/agar gel.

**Motion study of multi-stage hydrogel rockets.** To observe the motion of the multi-stage hydrogel rockets, 0.05 mol L<sup>-1</sup> glucose solution was used as the driving energy fuel, whose pH value was adjusted close to 8.0 by sodium bicarbonate, ionic strength was regulated by 0.15 mol L<sup>-1</sup> sodium chloride solution and initial temperature was set at 28 °C. The remote propulsion and detachment of small rockets from multi-stage hydrogel rockets were captured and recorded by using camera (CANON IXUS 220 HS). During the temperature-controlled process, small-rocket/GltAg0/small-rocket/GltAg6 rocket was propelled and the second GltAg0 stage dissolved by rising temperature to 31 °C to detach the first small rocket, and then the fourth GltAg6 stage dissolved by continuously rising temperature to 34 °C to detach the third small rocket, subsequently, the two released small rockets were propelled in the same environment. Meanwhile, during the NIR irradiation-controlled process, dissolving GNS-GltAg0 and GNS-GltAg6 stages of the small-rocket/GNS-GltAg0/small-rocket/GNS-GltAg6 hydrogel rocket was manipulated by NIR irradiation to detach the small rocket stages. The propulsion process of the control sample small-rocket/GltAg16/small-rocket/GltAg16 was recorded at 28 °C and the gelatin/agar gel stages (GltAg16) are insoluble. The trajectory and speed profiles of all rockets were traced and calculated by using the NIS-Elements AR 4.3 software.

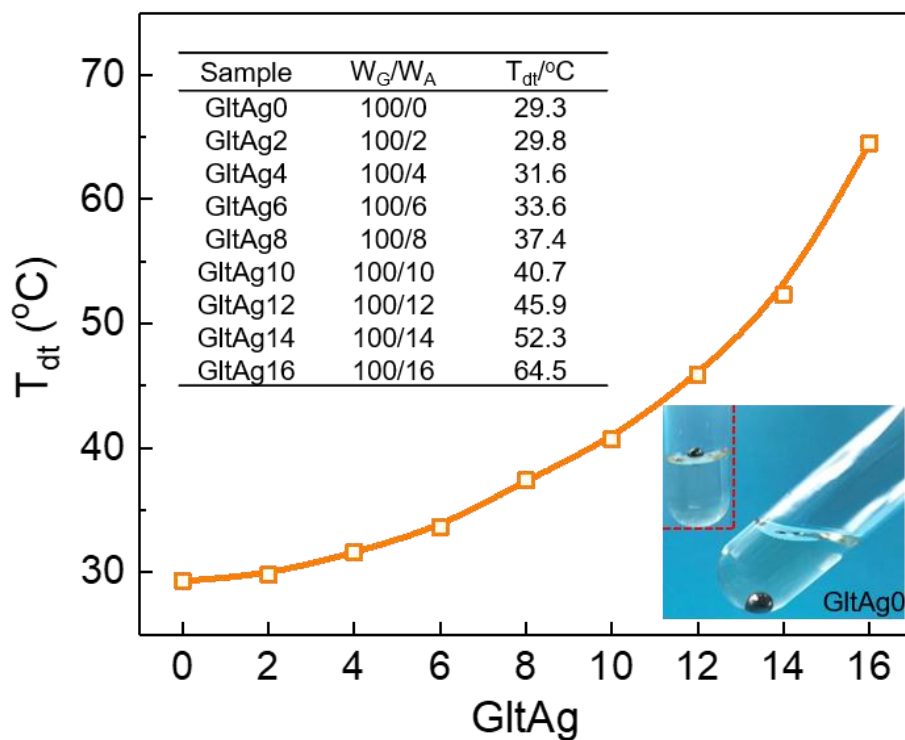

**Fig. S1** The dissolving temperature ( $T_{dt}$ ) of gelatin/agar gel with different formulas. The table shows the formulas of gelatin/agar gels, and their solid contents are 10 wt%. The inset image shows the gelling state at 4 °C (in the red box) and dissolving state of GltAg0 at high temperature of 29.3 °C.
